# Supplementary material for: Phase II study of durvalumab plus tremelimumab as therapy for patients with previously treated anti-PD-1/PD-L1 resistant stage IV squamous cell lung cancer (Lung-MAP substudy S1400F, NCT03373760)
Source: PubMed Central journal article supplement — J Immunother Cancer. 2021 Aug 24;9(8):e002973. doi: 10.1136/jitc-2021-002973 (PMC8386207; doi:10.1136/jitc-2021-002973), 2021-08-24

**Table S1. Gene Alterations Detected by Foundation Medicine Next-Generation Sequencing Screening**

| Gene Alteration                                                                                                                                                                                                                                                | n (%)<br>(N = 58) |
|----------------------------------------------------------------------------------------------------------------------------------------------------------------------------------------------------------------------------------------------------------------|-------------------|
| <b>Short Variants</b>                                                                                                                                                                                                                                          |                   |
| TP53                                                                                                                                                                                                                                                           | 53 (91)           |
| CDKN2A                                                                                                                                                                                                                                                         | 14 (24)           |
| MLL2                                                                                                                                                                                                                                                           | 10 (17)           |
| ARID1A, LRP1B, NFE2L2, PTEN                                                                                                                                                                                                                                    | 6 (10)            |
| NOTCH1                                                                                                                                                                                                                                                         | 5 (9)             |
| KDM6A, PIK3CA, RB1                                                                                                                                                                                                                                             | 4 (7)             |
| KEAP1, NOTCH2, TET2                                                                                                                                                                                                                                            | 3 (5)             |
| APC, ASXL1, ATM, BCORL1, CDC73, CREBBP, FBXW7, FGFR3, KRAS, NOTCH4, PIK3R1                                                                                                                                                                                     | 2 (3)             |
| ATRX, BARD1, BCOR, BRAF, BRCA2, CASP8, CIC, DNMT3A, EED, EGFR, EP300, EPHB1, FANCA, FANCC, FANCG, FAT3, HGF, HRAS, JAK3, MET, MSH3, MTOR, MUTYH, MYD88, NCOR1, NF1, NFKBIA, NOTCH3, PAK3, PALB2, PARP4, PBRM1, RUNX1T1, SETD2, TBX3, TERT, TRRAP, TSC1, ZNF703 | 1 (2)             |
| <b>Copy Number Alterations</b>                                                                                                                                                                                                                                 |                   |
| SOX2                                                                                                                                                                                                                                                           | 19 (33)           |
| PIK3CA                                                                                                                                                                                                                                                         | 14 (24)           |
| CDKN2A                                                                                                                                                                                                                                                         | 13 (22)           |
| CDKN2B                                                                                                                                                                                                                                                         | 10 (17)           |
| FGF12                                                                                                                                                                                                                                                          | 8 (14)            |
| AKT2, RICTOR                                                                                                                                                                                                                                                   | 6 (10)            |
| CCND1, EGFR, FGF19, FGF3, FGF4, FGFR1, ZNF703                                                                                                                                                                                                                  | 5 (9)             |
| CRKL                                                                                                                                                                                                                                                           | 4 (7)             |
| CCNE1, KDM5A, MYC                                                                                                                                                                                                                                              | 3 (5)             |
| BCL2L2, CUL4A, ERBB2, FGF10, MDM2, NF1, PTEN, REL                                                                                                                                                                                                              | 2 (3)             |
| AKT1, BACH1, BAP1, BCORL1, CCND2, CDK4, CDK6, CIC, DAXX, DIS3, EPHB1, ERBB4, FBXW7, FGF14, FGF23, FGF6, FGFR3, IRS2, KDM6A, KDR, KIT, KRAS, LRP1B, MCL1, MTAP, MYCL1, MYST3, NOTCH3, PDGFRA, PIK3CG, PRKCI, RAD21, RB1, RET, TERC                              | 1 (2)             |
| <b>Rearrangements</b>                                                                                                                                                                                                                                          |                   |
| CDK12, LRP1B                                                                                                                                                                                                                                                   | 2 (3)             |
| ARID1A, CASP8, EWSR1, MAP3K13, MLL2, MSH6, NF1, PTEN, TSC2                                                                                                                                                                                                     | 1 (2)             |

Supplemental Figure 1. Trial flow chart.

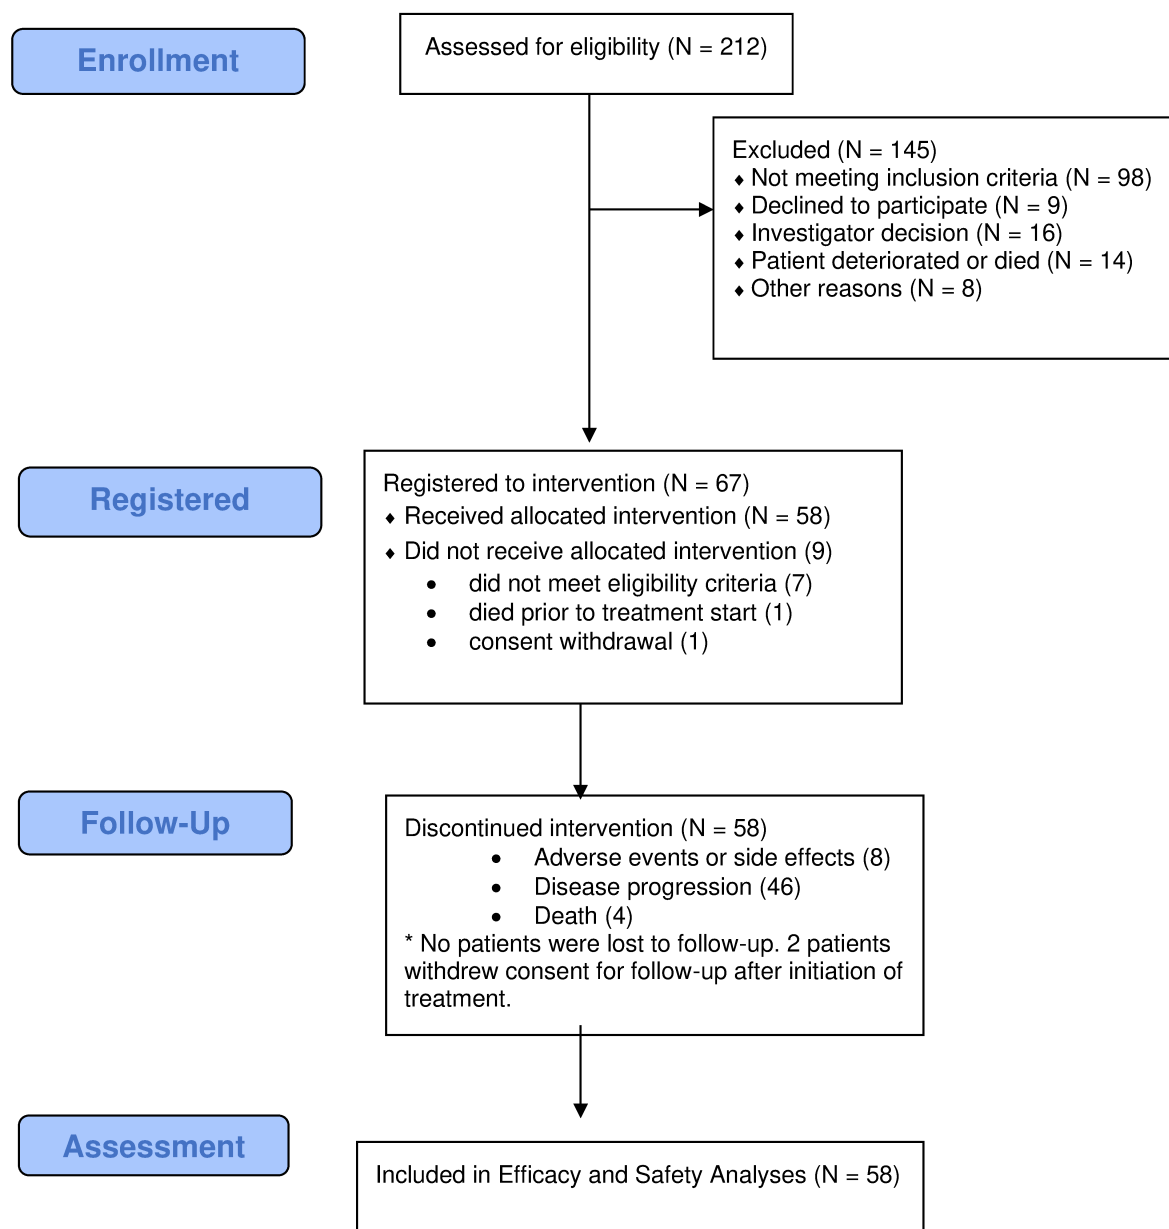

**Supplemental Figure 2. Kaplan-Meier curves of progression-free survival (PFS) and overall survival (OS) in the primary and acquired PD-(L)1 resistant cohorts by presence or absence of DDR gene mutation. (A) PFS. (B) OS. DDR, DNA damage response and repair.**

### A. PFS

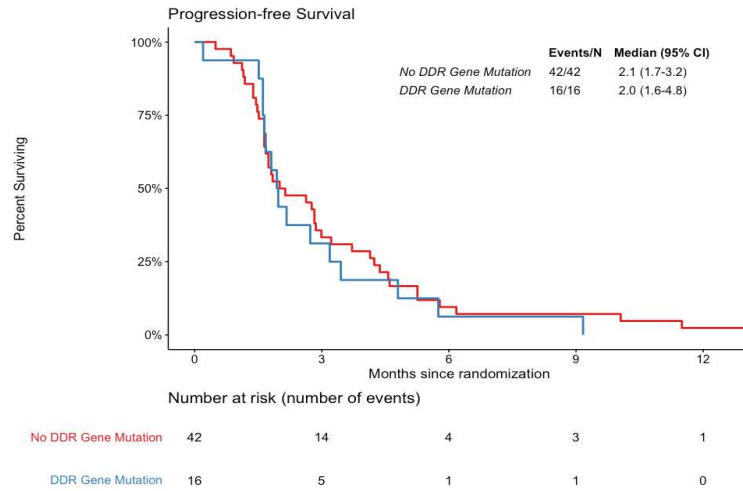

### B. OS

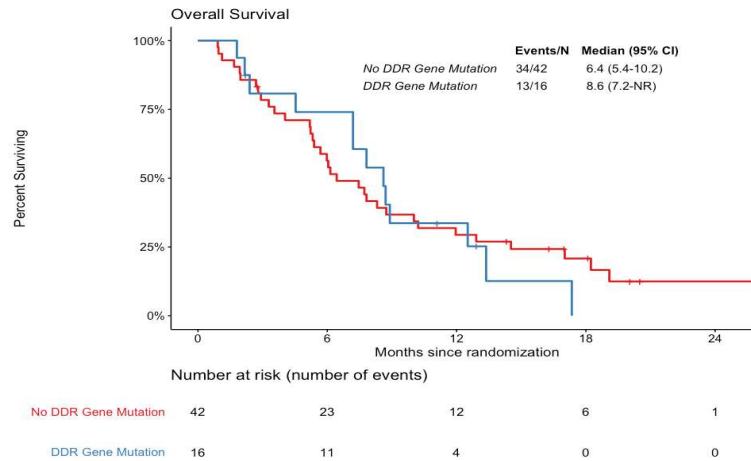

Supplement: jitc-2021-002973supp002.pdf [file jitc-2021-002973supp002.pdf]
